# Supplementary material for: Identification of a novel genetic locus underlying tremor and dystonia
Source: PubMed Central journal article supplement (PMC5674688; doi:10.1186/s40246-017-0123-5), 2017-11-06

Identification of a novel genetic locus underlying tremor and dystonia.

Dorota M. Monies, PhD<sup>1,2</sup>, Hussam Abou Al-Shaar, MD<sup>3</sup>, Ewa A. Goljan, MSc<sup>1,2</sup>, Banan Al-Younes, MSc<sup>1,2</sup>, Muna Monther Abdullah Al-Breacan, BSc<sup>1</sup>, Maher Mohammed Al-Saif, BSc<sup>4</sup>, Salma M. Wakil, PhD<sup>1,2</sup>, Brian F. Meyer, PhD<sup>1,2</sup>, Khalid S. A. Khabar, PhD<sup>4</sup> and Saeed Bohlega, MD<sup>2,3</sup>.

Movement Disorders

<sup>1</sup>Department of Genetics, Research Centre, King Faisal Specialist Hospital & Research Centre, Riyadh, Saudi

Arabia <sup>2</sup>Saudi Human Genome Program, King Abdulaziz City for Science and Technology, Riyadh, Saudi Arabia

<sup>3</sup>Department of Neurosciences, King Faisal Specialist Hospital & Research Centre, Riyadh, Saudi Arabia.

<sup>4</sup>Biomolecular Medicine, Research Centre, King Faisal Specialist Hospital & Research Centre, Riyadh, Saudi Arabia

Correspondence:

Dr. Saeed Bohlega, MD, FRCPC

Department of Neurosciences

King Faisal Specialist Hospital & Research Centre

PO Box 3354, Riyadh 11211

Kingdom of Saudi Arabia

Tel: +966-11-4424760

Fax: +966-11-4424763

[bohlega@kfshrc.edu.sa](mailto:bohlega@kfshrc.edu.sa)

### ***In situ* Hybridization**

In situ hybridization images were downloaded from the Allen Institute for Brain Science at [www.alleninstitute.org](http://www.alleninstitute.org) (Lein et al. 2007). Detailed methods used for preparation of slides, probe design, hybridization, staining, analysis and annotation are fully documented at <http://help.brain-map.org/download/attachments/2818169/ABADDataProductionProcesses.pdf?version=1&modificationDate=1319477154403>

### **Expression of CAMTA2 in human brain**

Immunohistochemical (IHC) staining of P56 mouse brain sagittal sections revealed expression of CAMTA2 in the granule cell layers of the dentate gyrus and the pyramidal layer, and less strongly in the piriform area pyramidal layer (Figure Panel A). CAMTA2 was also expressed in the cerebral cortex, specifically the granular layer of lobules IV-V, the simple lobule, crus 1, crus 2, paramedian lobule and copula pyramidus. Significant expression was also noted in the dorsal cochlear nucleus and principal sensory nucleus of the trigeminal nerve. Relative expression of CAMTA2 is indicated by the heatmap (Figure Panel B). Intense staining of Purkinje cells in the cerebellum was also evident (Figure Panel C). Expression patterns in mouse brain for specific isoforms of CAMTA2 were not available.

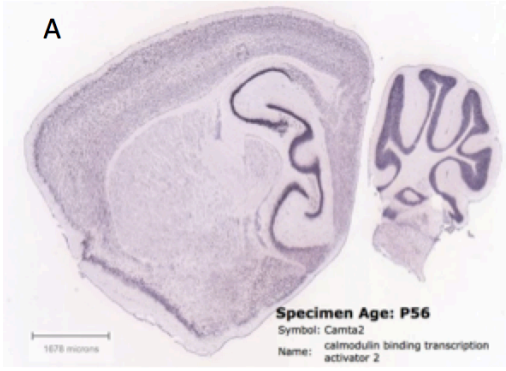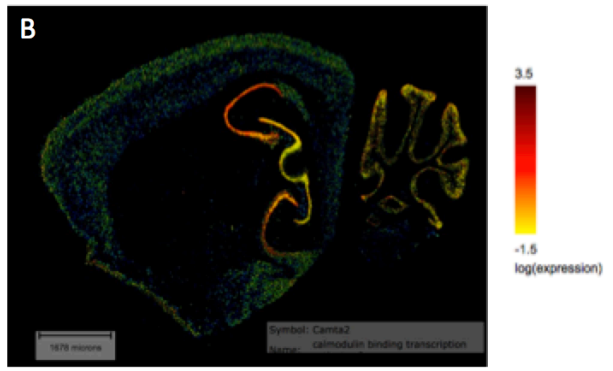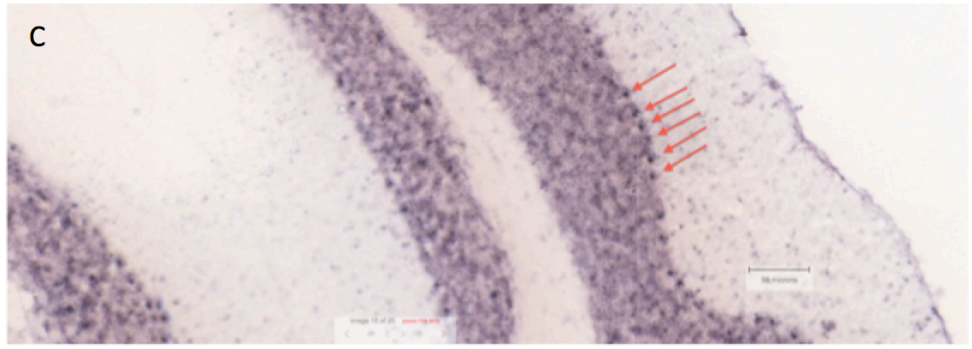

Supplement: 40246_2017_123_MOESM4_ESM.pdf [file 40246_2017_123_MOESM4_ESM.pdf]
