# Supplementary material for: Identification of a novel genetic locus underlying tremor and dystonia
Source: PubMed Central journal article supplement (PMC5674688; doi:10.1186/s40246-017-0123-5), 2017-11-06
Supplement: 40246_2017_123_MOESM2_ESM.pdf [file 40246_2017_123_MOESM2_ESM.pdf]

Identification of a novel genetic locus underlying tremor and dystonia.

Dorota M. Monies, PhD1,2, Hussam Abou Al-Shaar, MD3, Ewa A. Goljan, MSc1,2, Banan Al-Younes, MSc1,2, Muna Monther Abdullah Al-Breacan, BSc1, Maher Mohammed Al-Saif, BSc4, Salma M. Wakil, PhD1,2, Brian F. Meyer, PhD1,2, Khalid S. A. Khabar, PhD4 and Saeed Bohlega, MD2,3.

Movement Disorders

<sup>1</sup>Department of Genetics, Research Centre, King Faisal Specialist Hospital & Research Centre, Riyadh, Saudi Arabia

<sup>2</sup>Saudi Human Genome Program, King Abdulaziz City for Science and Technology, Riyadh, Saudi Arabia

<sup>3</sup>Department of Neurosciences, King Faisal Specialist Hospital & Research Centre, Riyadh, Saudi Arabia.

<sup>4</sup>Biomolecular Medicine, Research Centre, King Faisal Specialist Hospital & Research Centre, Riyadh, Saudi Arabia

Correspondence:

Dr. Saeed Bohlega, MD, FRCPC

Department of Neurosciences

King Faisal Specialist Hospital & Research Centre

PO Box 3354, Riyadh 11211

Kingdom of Saudi Arabia

Tel: +966-11-4424760

Fax: +966-11-4424763

[bohlega@kfshrc.edu.sa](mailto:bohlega@kfshrc.edu.sa)

VARIANTS IN CRITICAL INTERVAL

| chromosome | start pos | refGene gene    | refGene function | knownGene AA change                        |
|------------|-----------|-----------------|------------------|--------------------------------------------|
| chr17      | 4350182   | SPNS3           | splicing         |                                            |
| chr17      | 4352636   | SPNS3           | exonic           | SPNS3:uc002fxu.3:exon6:c.496G>A:p.G166R    |
| chr17      | 4455500   | MYBBP1A         | exonic           | MYBBP1A:uc002fxz.4:exon7:c.825A>G:p.A275A  |
| chr17      | 4457116   | MYBBP1A;MYBBP1A | exonic;splicing  | MYBBP1A:uc002fxz.4:exon5:c.550A>G:p.I184V  |
| chr17      | 4461748   | GGT6;GGT6       | exonic           | GGT6:uc002fyc.4:exon3:c.948C>T:p.P316P     |
| chr17      | 4497160   | SMTNL2          | exonic           | SMTNL2:uc002fye.2:exon4:c.342T>C:p.Y114Y   |
| chr17      | 4536241   | ALOX15          | exonic           | ALOX15:uc002fyh.3:exon11:c.1455A>G:p.T485T |
| chr17      | 4542794   | ALOX15          | exonic;splicing  | ALOX15:uc002fyh.3:exon2:c.268G>C:p.D90H    |
| chr17      | 4574751   | PELP1           | exonic           | PELP1:uc002fyi.4:exon17:c.3376A>T:p.T1126S |
| chr17      | 4575283   | PELP1           | exonic           | PELP1:uc002fyi.4:exon16:c.3003T>C:p.P1001P |
| chr17      | 4575923   | PELP1           | exonic           | PELP1:uc002fyi.4:exon16:c.2363T>G:p.V788G  |
| chr17      | 4575936   | PELP1           | exonic           | PELP1:uc002fyi.4:exon16:c.2350T>C:p.S784P  |
| chr17      | 4576347   | PELP1           | exonic           | PELP1:uc002fyi.4:exon16:c.1939A>C:p.T647P  |
| chr17      | 4576620   | PELP1           | exonic           | PELP1:uc002fyi.4:exon15:c.1770G>A:p.P590P  |
| chr17      | 4620497   | ARRB2           | splicing         |                                            |
| chr17      | 4641755   | CXCL16          | exonic           | CXCL16:uc002fyr.4:exon3:c.306G>A:p.G102G   |
| chr17      | 4645788   | ZMYND15         | splicing         |                                            |
| chr17      | 4684095   | TM4SF5;TM4SF5   | exonic;splicing  | TM4SF5:uc002fyw.1:exon2:c.189G>A:p.P63P    |
| chr17      | 4693054   | GLTPD2;GLTPD2   | exonic;splicing  | BC150535:uc002fyz.2:exon1:c.337C>T:p.P113S |
| chr17      | 4699552   | PSMB6           | exonic           | PSMB6:uc002fzb.4:exon1:c.63G>A:p.A21A      |
| chr17      | 4714199   | PLD2            | exonic           | PLD2:uc002fzc.3:exon10:c.963C>T:p.H321H    |
| chr17      | 4718776   | PLD2;PLD2       | exonic;splicing  | PLD2:uc002fzc.3:exon13:c.1179G>A:p.E393E   |
| chr17      | 4720469   | PLD2            | exonic           | PLD2:uc002fzc.3:exon17:c.1730C>T:p.T577I   |

|       |         |               |                 |                                                  |
|-------|---------|---------------|-----------------|--------------------------------------------------|
| chr17 | 4722876 | PLD2;PLD2     | exonic;splicing | PLD2:uc002fzc.3:exon23:c.2461G>A:p.G821S         |
| chr17 | 4796274 | MINK1;MINK1   | exonic;splicing | MINK1:uc010vsp.2:exon14:c.671T>C:p.V224A         |
| chr17 | 4796286 | MINK1;MINK1   | exonic;splicing | MINK1:uc010vsp.2:exon14:c.683C>T:p.P228L         |
| chr17 | 4796561 | MINK1         | splicing        |                                                  |
| chr17 | 4797305 | MINK1         | exonic          | MINK1:uc010vsp.2:exon17:c.970G>A:p.V324I         |
| chr17 | 4837300 | GP1BA         | exonic          | GP1BA:uc021tob.1:exon1:c.1401T>C:p.S467S         |
| chr17 | 4849030 | PFN1          | UTR3            |                                                  |
| chr17 | 4849193 | PFN1          | UTR3            |                                                  |
| chr17 | 4890930 | CAMTA2        | UTR5            |                                                  |
| chr17 | 4904564 | KIF1C         | exonic          | KIF1C:uc002gan.2:exon5:c.231T>C:p.I77I           |
| chr17 | 4910308 | KIF1C         | exonic          | KIF1C:uc002gan.2:exon14:c.1264_1265AG            |
| chr17 | 4923876 | KIF1C         | exonic          | KIF1C:uc002gan.2:exon20:c.1840C>A:p.P614T        |
| chr17 | 4926882 | KIF1C         | exonic          | KIF1C:uc002gan.2:exon23:c.2748A>G:p.P916P        |
| chr17 | 4936898 | SLC52A1       | exonic          | SLC52A1:uc010ckw.3:exon2:c.520G>A:p.V174M        |
| chr17 | 4937575 | SLC52A1       | exonic          | SLC52A1:uc002gao.4:exon3:c.209A>G:p.Q70R         |
| chr17 | 5036272 | USP6;USP6     | exonic;splicing | USP6:uc002gav.1:exon5:c.263A>C:p.K88T            |
| chr17 | 5042894 | USP6          | exonic          | USP6:uc002gav.1:exon14:c.1423T>C:p.W475R         |
| chr17 | 5085857 | ZNF594        | exonic          | ZNF594:uc021tol.1:exon1:c.1695G>A:p.A565A        |
| chr17 | 5086163 | ZNF594        | exonic          | ZNF594:uc021tol.1:exon1:c.1388_1389insA:p.S463fs |
| chr17 | 5280440 | RABEP1        | exonic          | RABEP1:uc010cld.1:exon13:c.1926T>C:p.R642R       |
| chr17 | 5284698 | RABEP1;RABEP1 | exonic;splicing | RABEP1:uc002gbl.4:exon16:c.2286A>G:p.Q762Q       |
| chr17 | 5284719 | RABEP1        | exonic          | RABEP1:uc002gbl.4:exon16:c.2307T>C:p.N769N       |
| chr17 | 5284770 | RABEP1        | exonic          | RABEP1:uc002gbl.4:exon16:c.2358G>A:p.R786R       |
| chr17 | 5289580 | NUP88;NUP88   | exonic;splicing | NUP88:uc002gbo.2:exon17:c.2172T>C:p.H724H        |
| chr17 | 5290033 | NUP88;NUP88   | exonic;splicing | NUP88:uc002gbo.2:exon16:c.2157A>G:p.K719K        |
| chr17 | 5290703 | NUP88         | splicing        |                                                  |
| chr17 | 5294976 | NUP88;NUP88   | exonic;splicing | NUP88:uc002gbo.2:exon10:c.1389A>T:p.P463P        |

|       |         |             |                 |                                          |
|-------|---------|-------------|-----------------|------------------------------------------|
| chr17 | 5308377 | NUP88;NUP88 | exonic;splicing | NUP88:uc002gbo.2:exon6:c.1044G>A:p.T348T |
| chr17 | 5326089 | RPAIN;RPAIN | exonic;splicing | RPAIN:uc002gbp.1:exon3:c.413C>T:p.A138V  |
| chr17 | 5326145 | RPAIN;RPAIN | exonic;splicing | RPAIN:uc002gbp.1:exon3:c.469C>G:p.P157A  |
| chr17 | 5326162 | RPAIN       | splicing        |                                          |
| chr17 | 5347576 | DHX33       | exonic          | DHX33:uc010clf.3:exon8:c.1578C>T:p.Y526Y |
| chr17 | 5392820 | MIS12       | UTR3            |                                          |
| chr17 | 5461878 | NLRP1       | exonic          | NLRP1:uc002gcg.1:exon4:c.2138C>A:p.P713Q |
| chr17 | 5487164 | NLRP1       | exonic          | NLRP1:uc002gcg.1:exon1:c.114G>C:p.S38S   |
| chr17 | 5991344 | WSCD1       | exonic          | WSCD1:uc031qyk.1:exon2:c.114C>T:p.H38H   |
| chr17 | 6014176 | WSCD1       | exonic          | WSCD1:uc010clj.3:exon5:c.168A>G:p.T56T   |
